# Supplementary material for: A Top-Down Approach and Thermal Characterization of Luminescent Hybrid BPA.DA-MMA@Ln2L3 Materials Based on Lanthanide(III) 1H-Pyrazole-3,5-Dicarboxylates
Source: MDPI journal article supplement (doi:10.3390/ma15248826), 2022-12-10
Supplement: s1 [file s1]

**Table S1.** Parameters of materials synthesis.

| Material                                       | Eu <sub>2</sub> L <sub>3</sub><br>(g) | Tb <sub>2</sub> L <sub>3</sub><br>(g) | BPA.DA<br>(g) | MMA<br>(g) | IRGACORE<br>(g) |
|------------------------------------------------|---------------------------------------|---------------------------------------|---------------|------------|-----------------|
| BPA.DA-MMA                                     | -                                     | -                                     | 5.6           | 2.4        | 0.08            |
| BPA.DA-MMA@0.1% Eu <sub>2</sub> L <sub>3</sub> | 0.008                                 | -                                     | 5.6           | 2.4        | 0.08            |
| BPA.DA-MMA@0.2% Eu <sub>2</sub> L <sub>3</sub> | 0.016                                 | -                                     | 5.6           | 2.4        | 0.08            |
| BPA.DA-MMA@0.5% Eu <sub>2</sub> L <sub>3</sub> | 0.04                                  | -                                     | 5.6           | 2.4        | 0.08            |
| BPA.DA-MMA@1% Eu <sub>2</sub> L <sub>3</sub>   | 0.08                                  | -                                     | 5.6           | 2.4        | 0.08            |
| BPA.DA-MMA@2% Eu <sub>2</sub> L <sub>3</sub>   | 0.16                                  | -                                     | 5.6           | 2.4        | 0.08            |
| BPA.DA-MMA@0.1% Tb <sub>2</sub> L <sub>3</sub> | -                                     | 0.008                                 | 5.6           | 2.4        | 0.08            |
| BPA.DA-MMA@0.2% Tb <sub>2</sub> L <sub>3</sub> | -                                     | 0.016                                 | 5.6           | 2.4        | 0.08            |
| BPA.DA-MMA@0.5% Tb <sub>2</sub> L <sub>3</sub> | -                                     | 0.04                                  | 5.6           | 2.4        | 0.08            |
| BPA.DA-MMA@1% Tb <sub>2</sub> L <sub>3</sub>   | -                                     | 0.08                                  | 5.6           | 2.4        | 0.08            |
| BPA.DA-MMA@2% Tb <sub>2</sub> L <sub>3</sub>   | -                                     | 0.16                                  | 5.6           | 2.4        | 0.08            |

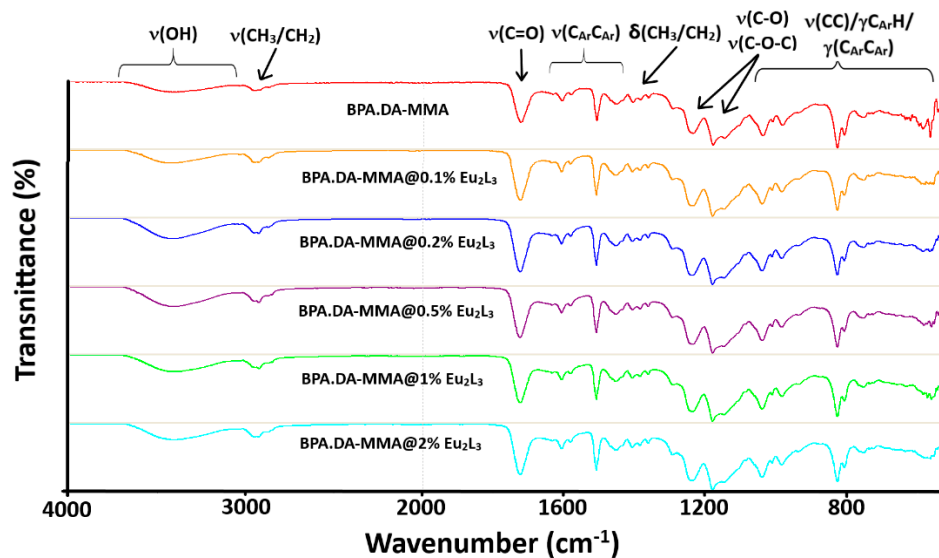

**Figure S1.** ATR-FTIR spectra of BPA.DA-MMA (polymeric matrix) and BPA.DA-MMA@0.1-2%Eu<sub>2</sub>L<sub>3</sub>

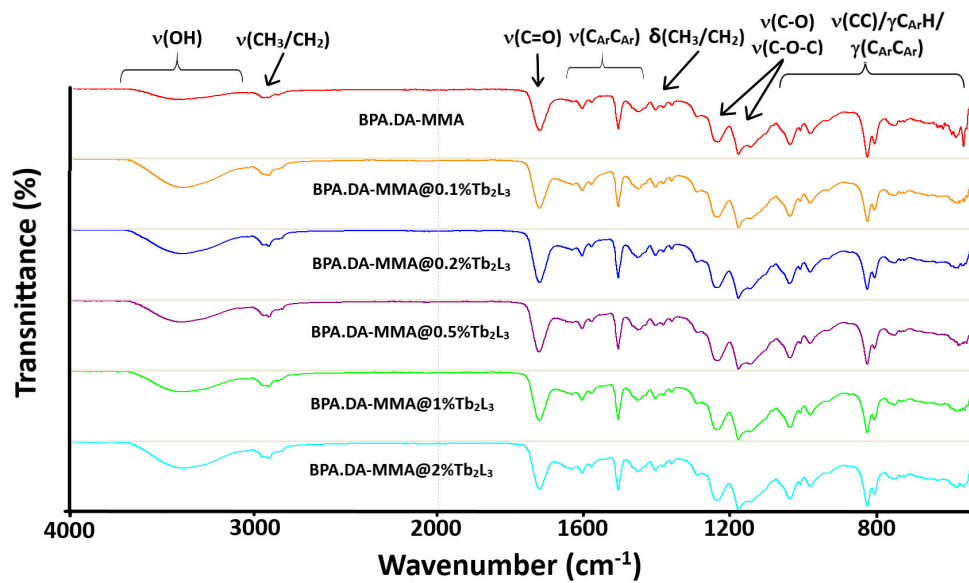

**Figure S2.** ATR-FTIR spectra of BPA.DA-MMA (polymeric matrix) and BPA.DA-MMA@0.1-2%Tb<sub>2</sub>L<sub>3</sub>

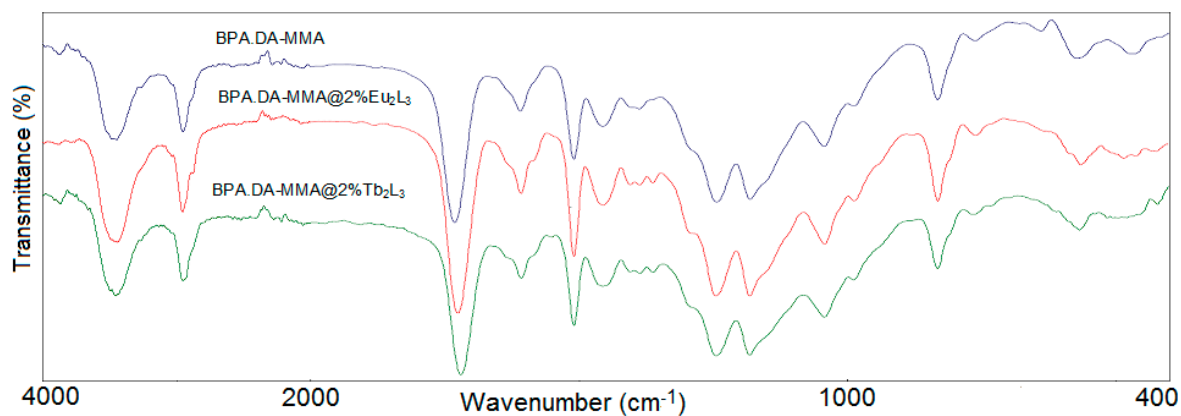

**Figure S3.** The transmittance FTIR spectra.

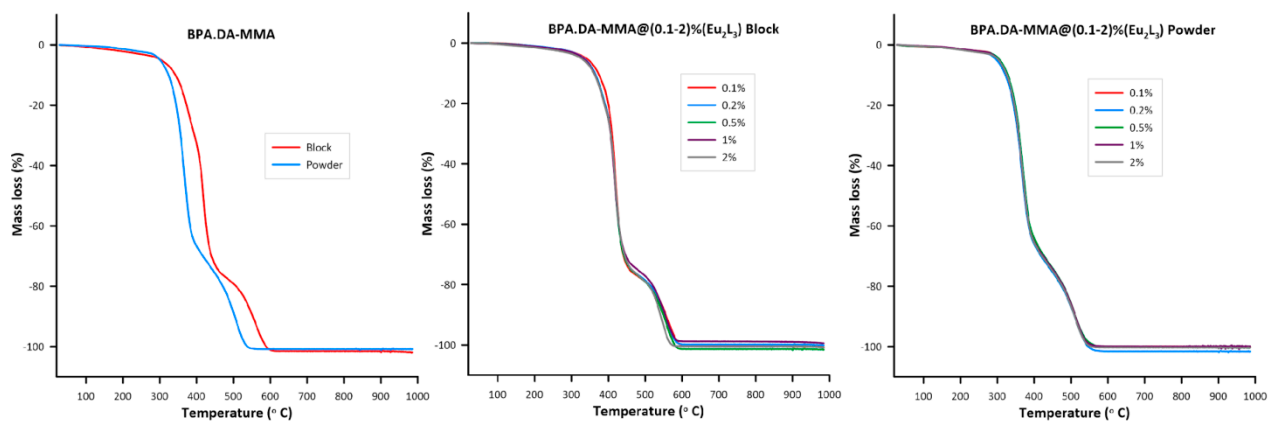

**Figure S4.** The TG curves of powder and block hybrid materials doped with europium complex (air).

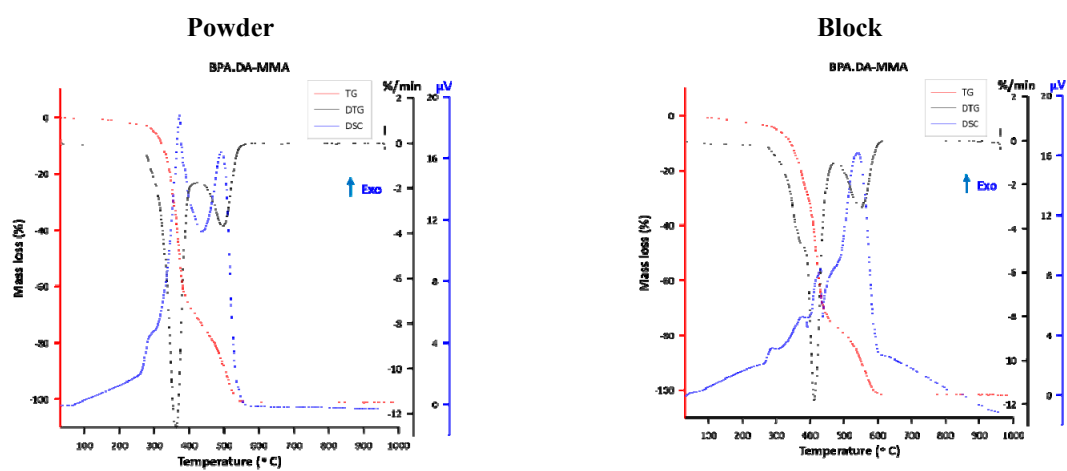

**Figure S5.** TG/DTG/DSC curves of polymeric matrix.

## Powder

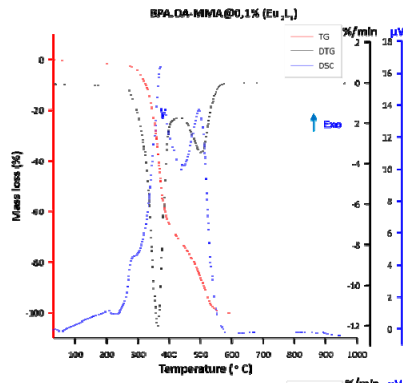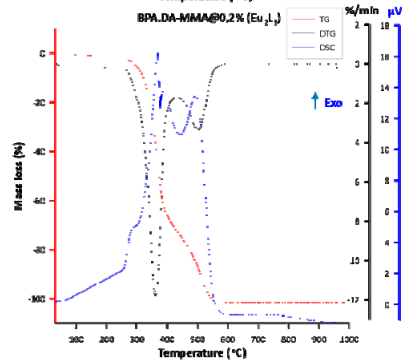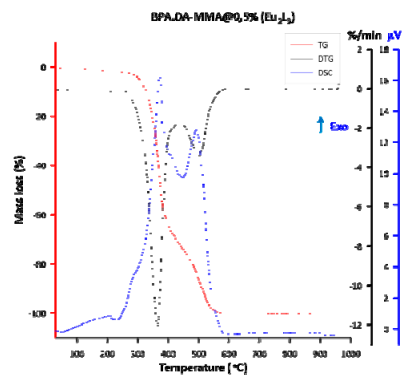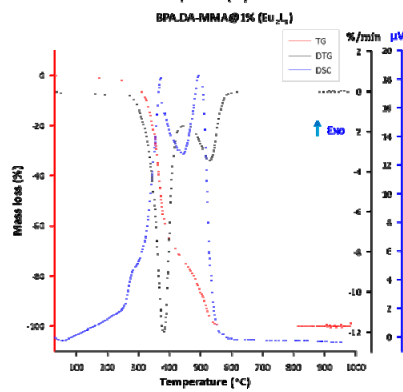

## Block

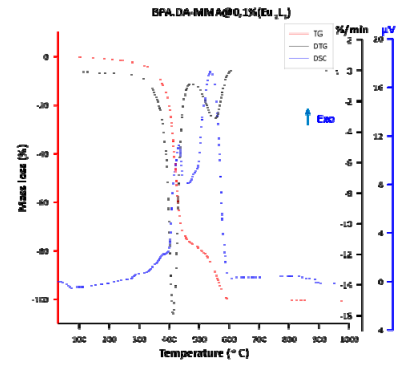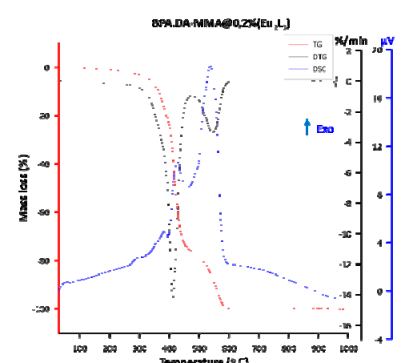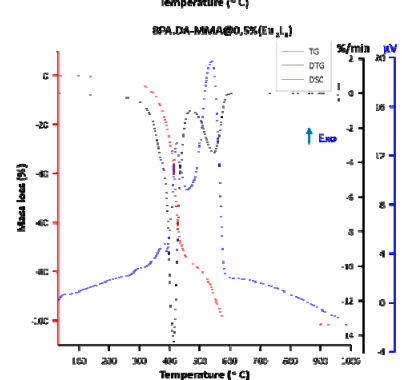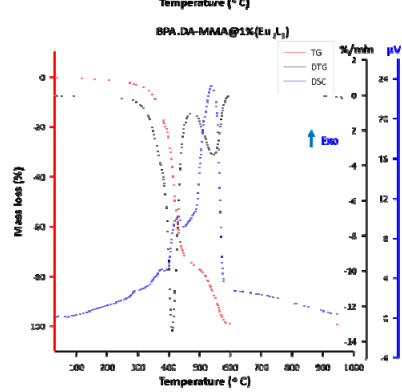

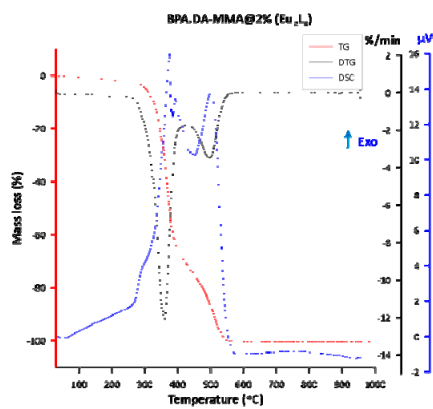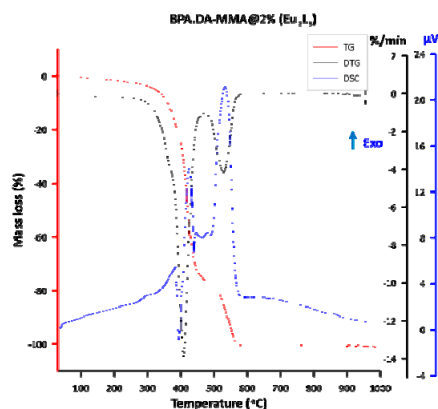

Figure S6. TG/DTG/DSC curves of hybrid materials doped with europium(III) complex.

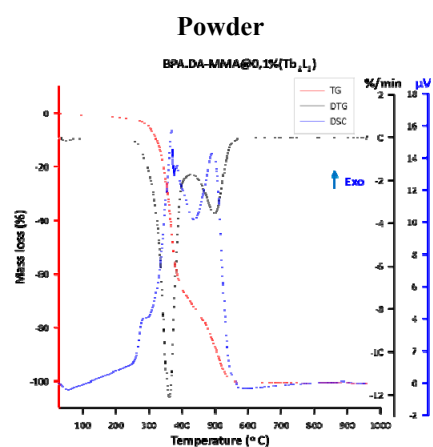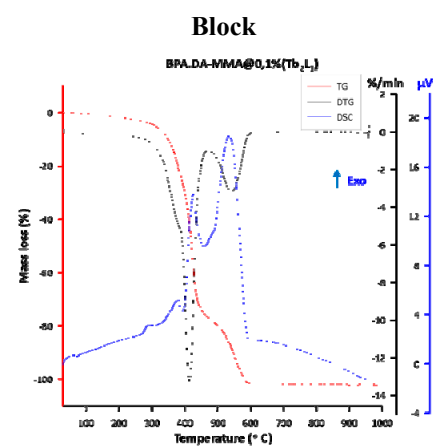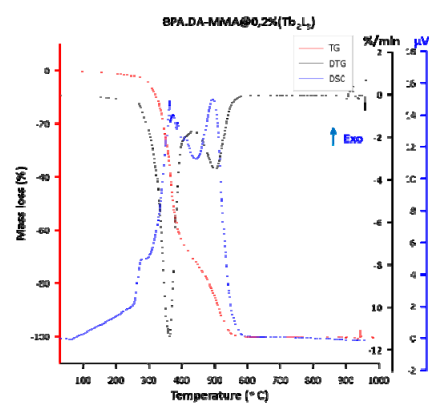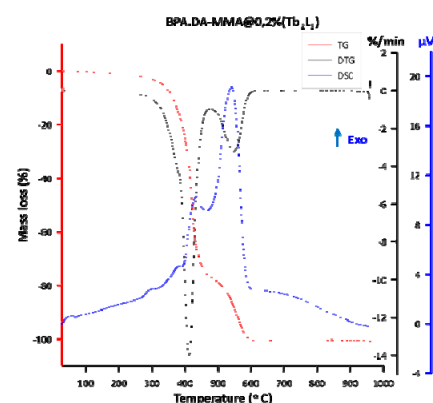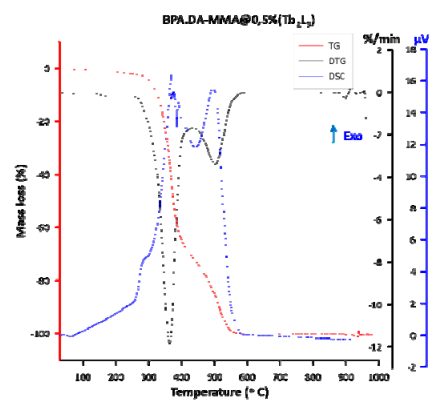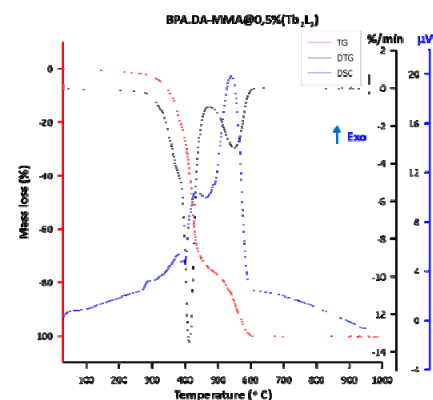

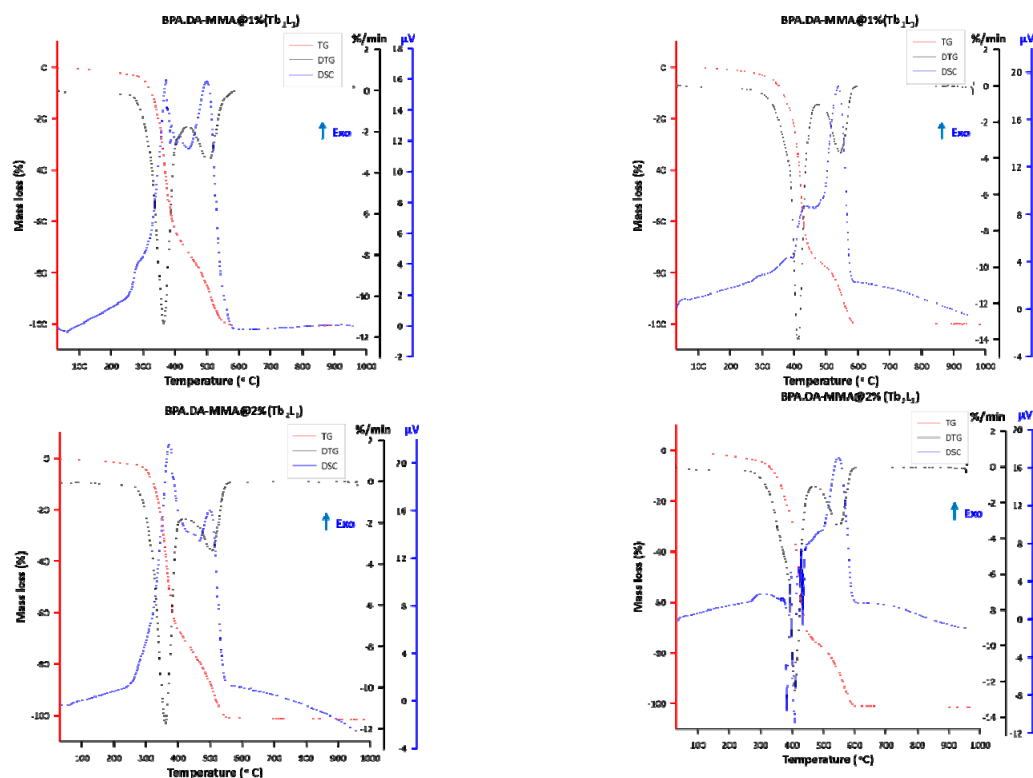

**Figure S7.** TG/DTG/DSC curves of hybrid materials doped with terbium(III) complex.

**Table S2.** Thermogravimetric results of free matrix and hybrid materials with 2 wt. % amount of dopant (blocks) in air and nitrogen.

| Compounds                                    | Mass loss | Temperature (°C)<br>air | Temperature (°C)<br>nitrogen |
|----------------------------------------------|-----------|-------------------------|------------------------------|
| BPA.DA-MMA                                   | 1%        | 228                     | 261                          |
|                                              | 5%        | 340                     | 352                          |
|                                              | 20%       | 399                     | 397                          |
|                                              | 50%       | 420                     | 419                          |
| BPA.DA-MMA@2% Eu <sub>2</sub> L <sub>3</sub> | 1%        | 162                     | 264                          |
|                                              | 5%        | 325                     | 361                          |
|                                              | 20%       | 387                     | 400                          |
|                                              | 50%       | 420                     | 421                          |
| BPA.DA-MMA@2% Tb <sub>2</sub> L <sub>3</sub> | 1%        | 118                     | 267                          |
|                                              | 5%        | 315                     | 361                          |
|                                              | 20%       | 379                     | 401                          |
|                                              | 50%       | 420                     | 424                          |

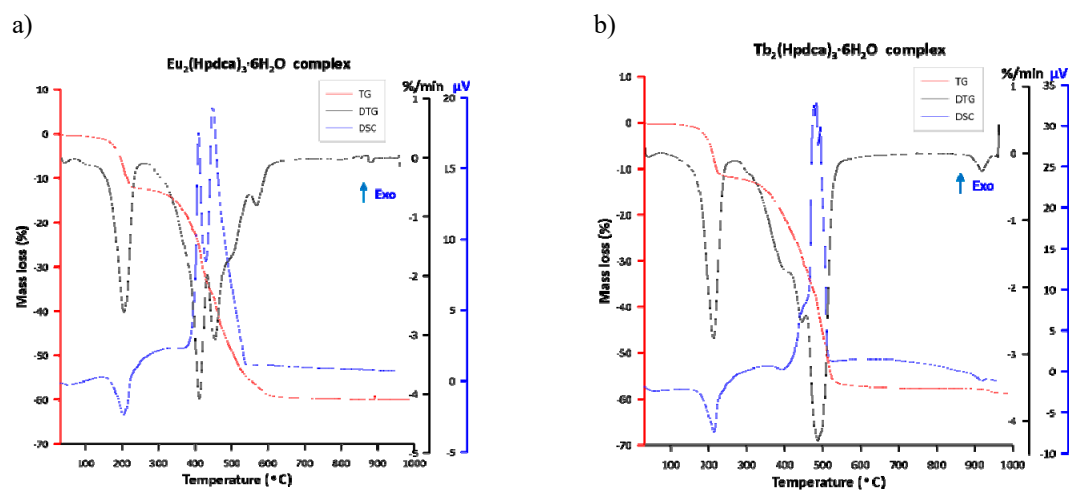

**Figure S8.** TG/DTG/DSC curves doped complexes: a) hexahydrate europium complex and b) hexahydrate terbium complex (air).

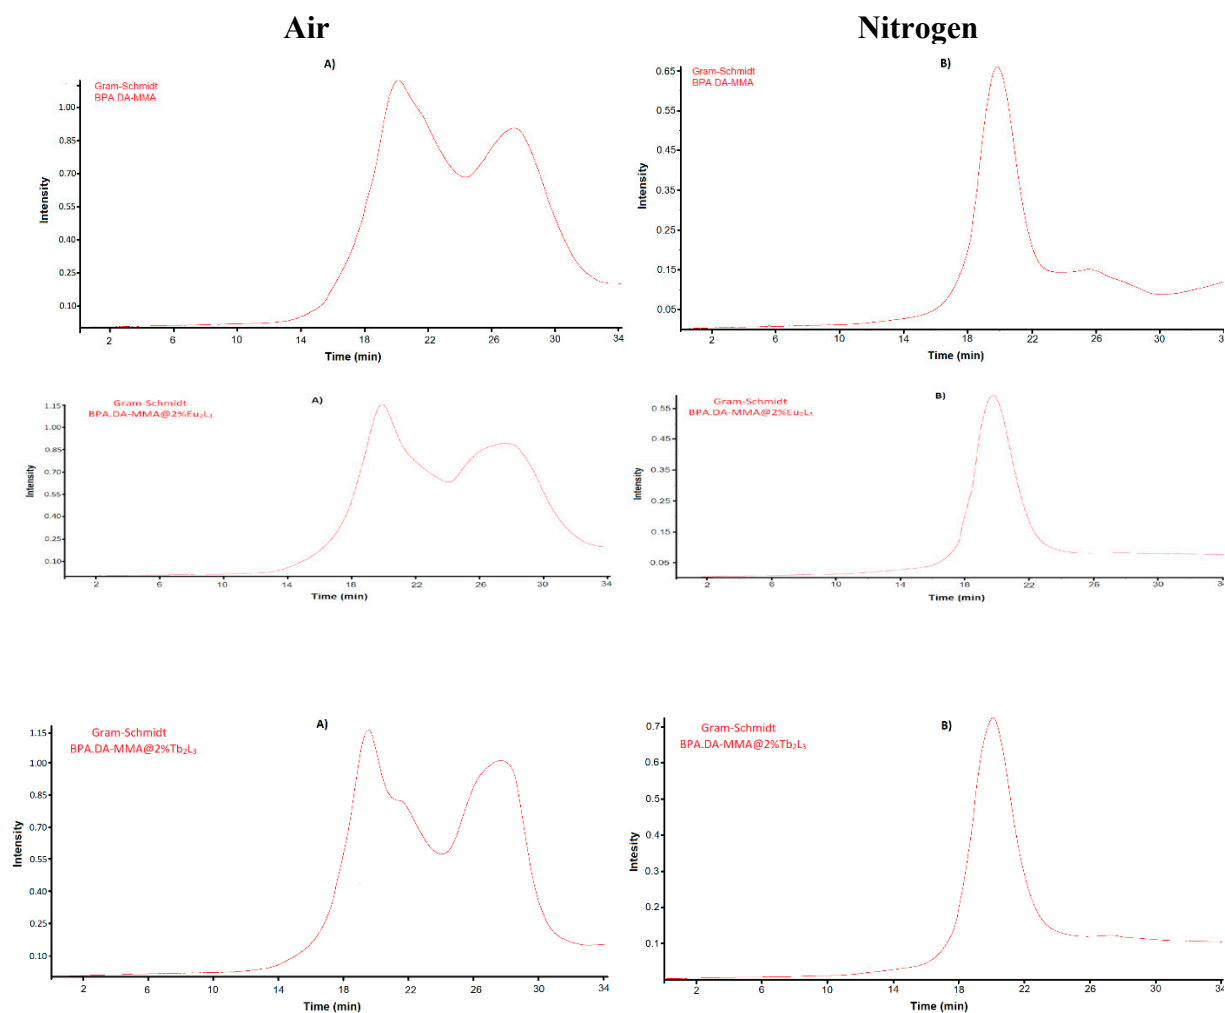

**Figure S9.** Gram-Schmidt plots.

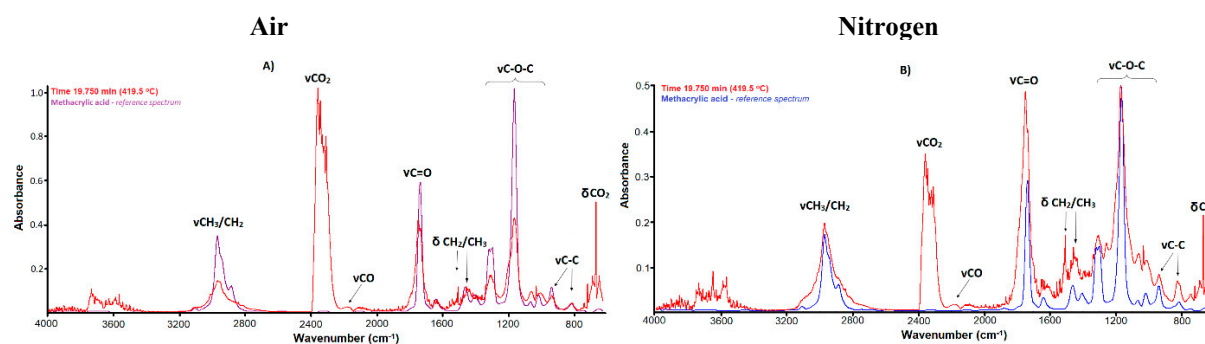

**Figure S10.** Compare gas (air/nitrogen) products in the time: 19.750 min.
